# Supplementary material for: Mouse chromosome 17 candidate modifier genes for thrombosis
Source: PubMed Central journal article supplement — Mamm Genome. 2010 Aug 11;21(7):337–49. doi: 10.1007/s00335-010-9274-6 (PMC2923722; doi:10.1007/s00335-010-9274-6), 2010-08-11

## Supplemental Materials.

Supplementary Table 1. PCR primers used in this study

| Gene     | Purpose | Forward primer           | Reverse primer            |
|----------|---------|--------------------------|---------------------------|
| GAPDH    | RT      | CATGGCCTTCCGTGTTCTTA     | GCCTGCTTCACCACCTTCT       |
| Vapa     | RT      | GCAGATCCTGGTCCTCGA       | CGAGGTGCTGTAGTCTTCACT     |
| Txndc2   | RT      | GACAGCGTCCAATCCAAGG      | CTTCACTCTCCTTTGACTGAACG   |
| Rab31    | RT      | GCGATTGCTGGGAACAAGTGT    | GCGGCTGATTCCTTGAAAGAG     |
| Ppp4r1   | RT      | AGTCCAGGATGTTGTACCACA    | TCGTAAGTCTCCCTCAAGCA      |
| Ralbp1   | RT      | CACCGTGCAGATCAGCAATCG    | ACCAGCGCAGAGGTCTTG        |
| Twsg1    | RT      | ACTGTGTCGGTATGTGCAACC    | CCTGAACAGGGACGGAATGG      |
| Ankrd12  | RT      | GACCGAGGTGATATGGGCAAG    | CCTGGGTCTGAATCTGTGTCTGA   |
| Ndufv2   | RT      | GCAGAATGGATGGCTACCTATCTC | CCTGGATATGGTACTCCCAACTG   |
| Rab12    | RT      | GCAGGGCAGGAGCGATT        | TGGCAAGTCATCGAACGTCTC     |
| Ptprm    | RT      | CTGTCGGAGCAACCTATCTGTG   | CTGGCTGCCGATCATTCCA       |
| Lrrc30   | RT      | GAACCTGGAGGTGCTGAG       | CAGGCACTGGATGCTCTC        |
| Lama1    | RT      | CGTGGATGGCGTCAAGTTCA     | GAGGTGCAGATGACTTCGTTGT    |
| Arhgap28 | RT      | CACGGCGACCCACATCAT       | GCCTCATTATCCTTCTGACCTG    |
| Epb4.1l3 | RT      | CTGGTAGAGGAGAGGCATGTGAT  | GCGATCTGTGGGTGTGGATT      |
| Zfp161   | RT      | TCACCTCAAGGACCACGAGA     | GTCTCACTCTGGATGGCACTG     |
| Dlgap1   | RT      | ACTCCTTGTACACCACTCAGAC   | CGCACTCGGCCTGGAA          |
| Tgif     | RT      | CAATCTGCCAAGGAGTCAGT     | GGCGTTGATGAACCAGTTACAG    |
| My12b    | RT      | GCCTTCGCTTGCTTTGATGAG    | CATCCACTTCCTCGTCTGTGA     |
| Myom1    | RT      | CGCCGCCAGGAGTCA          | GCTCCAAGACTGTAGGTCTGTGA   |
| Lpin2    | RT      | GCAGTGCTGTGGATCTTCAC     | GAGGTGGCAAGATAAGCAGGTA    |
| Emilin2  | RT      | GAGAAGGTCGTCCGACTCA      | TCTGCCATCATCTTGAATGGTGT   |
| Smchd1   | RT      | AGAAGCTGCTGGTGGAACTTA    | CCTCCATGCTGACTGATATGTGA   |
| Ndc80    | RT      | CCTTGGTGTGGCTCATAGACT    | CCAGAGCTGCCCATCATCA       |
| Emilin2  | C       | CAGCCTTGTGGGGCTC         | TCT TCC CTT CCT GGT CTC C |
| Emilin2  | S       | GCAGTGGAACCAGGTCAG       | —                         |
| Emilin2  | S       | GAGCAGGTCCTAATGGAGTTG    | —                         |
| Emilin2  | S       | GTGTAAGGAGAGTGCTCACG     | —                         |
| Emilin2  | S       | CTGCCTCGGGGAGTG          | —                         |
| Emilin2  | P       | CACACATGGGCACTCACATAT    | GCGAAAGTTGAAGACGCAGG      |
| Emilin2  | PS      | GTTTCATGAACGGATTATGTCC   | —                         |
| Emilin2  | 5N      | CAAATGACAGTTTGCAGCTGC    | GCGTCCAGCGACTGGGTG        |

RT: real-time; C: coding; S: sequencing; P: promoter; PS: promoter sequencing; 5'-noncoding; 5N

**Supplementary Table 2.** Comparison of SNPs in *Emilin2* in B6, 129/svJ, and A/J Mice

| Position              | B6 | 129/svJ | A/J | Amino Acid Change | Position          | B6 | 129/svJ | A/J |  |
|-----------------------|----|---------|-----|-------------------|-------------------|----|---------|-----|--|
| <b>Non-synonymous</b> |    |         |     |                   | <b>Synonymous</b> |    |         |     |  |
| 71604573              | T  | C       | C   | T/A               | 71602195          | A  | G       | G   |  |
| 71605329              | T  | C       | C   | T/A               | 71604484          | A  | G       | G   |  |
| 71605888              | T  | C       | C   | Q/R               | 71622823          | C  | T       | T   |  |
| 71623085              | G  | A       | A   | A/V               | 71622847          | C  | T       | T   |  |
| 71623358              | A  | C       | C   | V/G               | 71623615          | G  | A       | A   |  |
| 71623623              | T  | C       | C   | T/A               | 71623660          | C  | T       | T   |  |
| 71624297              | C  | G       | G   | S/T               | 71623822          | C  | T       | T   |  |
| 71624328              | C  | T       | C   | A/T               | 71624089          | G  | A       | A   |  |
| 71624526              | G  | G       | A   | L/F               | 71624224          | A  | G       | G   |  |
| 71624555              | A  | G       | G   | V/A               | 71624530          | C  | T       | T   |  |
| 71624556              | C  | T       | T   | V/I               | 71624608          | A  | G       | G   |  |
| 71624586              | A  | G       | G   | S/P               |                   |    |         |     |  |
| 71630050              | A  | G       | G   | S/P               |                   |    |         |     |  |

The SNPs were retrieved from the Sanger Mouse Genome project – SNPs. Amino Acid Changes are indicated as B6 vs. A/J or 129/svJ

**Supplementary Figure 1. Sequence alignment of EMILIN2.**

The amino acid sequences were retrieved from NCBI protein database. Homo sapiens (human), NM\_032048; Rattus norvegicus (Norway rat), XM\_237520; Bos Taurus (cattle), NM\_001143869; Equus caballus (horse), XM\_001915828; Polymorphisms at the conserved sites in mammals are highlighted.

**Supplementary Figure 2. Rebleeding in 129/svJ mice.**

Rebleeding (clot stability) time in 129/svJ mice is longer than for B6 mice. Polymorphisms are similar in A/J and 129/svJ mice.



C57BL/6J IHSLEDRLG--IVLQAAN----SSDVELTPMGPALPEQPGAENEQVLMELSRLKDKVQVV  
A/J IHSLEDRLG--IVLQAAN----SSDVELTPMGPALPEQPGAENEQVLMELSRLKDKVQVV  
Homo\_sapiens IQSLEDRLGSVLLQMTNN---TGAE LSPPGAALPGVSGSDERVMELNHLKDKVQVV  
Bos\_taurus IQSLEERLGSALLEMVNG---SEMVPAP-VAAPPTVSGAGPPQVMMLKRLKDKVQVV  
Equus\_caballus IQSLEERLGSVLLLEMAN----TDAELTAP-ASALPGVSGAGHEQVMMLSHLKNKVKVV  
Rattus\_norvegicus IHSLEDRLGIILQVTNGSDLELTPVGPALSGQPQPGAENEQLLRELSRLKDKVQVV  
\*:\*:\*:\*:\* : . : . . . \* \* : : : \* : \* : \* : \*

C57BL/6J EDFCLQSLP---HGIDGALPSVED-LTHVLSLLES LNDTMHRQFQETSHSIQKLQEDVN  
A/J EDFCLQSLP---HGIDGALPSGED-LTHVLSLLES LNDTMHRQFQETSHSIQKLQEDVN  
Homo\_sapiens EDICLLNIQKPHGMEGALPNREDRAVRDSLHLLKSLNDTMHRKFQETEQTIQKLQDQDFS  
Bos\_taurus EDMCLQNFGRGEPGMEDTLRNGGE-----MVSLRLSLNDTMGGKFQDTERS IQRLQDQDFS  
Equus\_caballus EDICLQNFQGEPHGIEGTLPSGEDHTMGNSLSLLKSLNDTMHRKFQETEHSIQKLQDQDFS  
Rattus\_norvegicus EDICLQSLP---HGIDGALPSGED-LTHVLSLLES LNDTMHRQFQETSHSIQKLQEDQDFS  
\*:\*:\* \* : : \* : : \* : : : \* : \* : \* : \* : \* : \* : \*

C57BL/6J ALHSQLNHSECTGTYLQNGVSDSRTGDSMEASGFTKTGEQERTVGTVPSPGTPAAPCCGQ  
A/J ALHSQLNHSECTGTYLQNGVSDSRTGDSMEASGFTKTGEQERTVGTVPSPGTPVAPCCGQ  
Homo\_sapiens FLYSQLNHTENDVTHLQKEMSNCRAGENAGMGRFTKVGEQERTVDTLPSQPHPVAHCCSQ  
Bos\_taurus FLYSWLNHTDDHLRRLQNELSGGRGGKKAAGGGWSKVGEPRTEAPLPSQPAPVAHCCDQ  
Equus\_caballus FLYSQLNHTEDDVNHLQKELSSCREGRNTGVDGFSKEDEQERTVEPLPSQDPMHCCSQ  
Rattus\_norvegicus ALYSQLNHSEYTGTRLPNGVS-----DSMEASGFTKTGEQERTVGTVPSPGTPAAPCCGQ  
\*:\* \* \* : : \* : : \* : : . : : \* \* \* : : \* \* \* : : \* \* \* : \*

C57BL/6J LEERWQKLQNLAEALDTCESAHGVQSGVSAIEGRVFQLEQTCRRLDTISGSLQRIKEG  
A/J LEERWQKLQNLAEALDTCESAHGVQSGVSAIEGRVFQLEQTCRRLDTISGSLQRIKEG  
Homo\_sapiens LEERWQRLQSQVISELDACKECTQGVQREVSVMVEGRVSHMEKTC SKLDSISGNLQRIKEG  
Bos\_taurus LEGRWQRLQDLVLSLDTCKEKTHGVQREVSVDVDRVSHVEKTC SKLDSISGSLQRIKEG  
Equus\_caballus LEERWQRLQGVLSLDTCKENTHGVQREVSVDVDRVSHMEKTC SKLDSISGSLQRIKEG  
Rattus\_norvegicus LEERWQRLQNLAEALDTCESAHGVQSGVSAIEGRVQLEKTCRRLDAISGSLQRIKEG  
\*\* \* \* : \* : : \* \* : \* : \* : \* : \* : \* : \* : \* : \* : \* : \* : \*

C57BL/6J LGKHVGS L WNCIRQMNGTLKSHSRDISGLKNSVQQFYSHVFQISTDLQDLVKFQPSATEE  
A/J LGKHVGS L WNCIRQMNGTLKSHSRDISGLKNSVQQFYSHVFQISTDLQDLVKFQPSATEE  
Homo\_sapiens LNKHVSSLWNCV RQMNGTLRSHSRDISGLKNSVQQFYSHVFQISTDLQDLVKFQPSAKAP  
Bos\_taurus LNKHVNSLWSCIRQMNGTLRTHSREISSLKNSVQQFYSHVFQISADLQDLIRFQPSAKTP  
Equus\_caballus LNKHVSSLWSCIRQMNGTLRSHSRDIAGLKNSIQQFYSHVFQISTDLQDLIKFQPSAKAP  
Rattus\_norvegicus LGKHVGS L WNCV RQMNGTLRSHSRDISGLKNSVQQFYSHVFQISTDLQDLVSGFQPSATEE  
\* . \* \* . \* \* : \* : \* : \* : \* : \* : \* : \* : \* : \* : \* : \* : \*

C57BL/6J PSEATEGPGSKTPLESTRPSEEAPEPPRLTPLPEDPAGPPQTGQPPVLPQRPLQPPPLP  
A/J PSEATEGPGSKTPLESTRPSEEAPEPPRLTPLPEDPAGPPQTGQPPVLPQRPLQPPPLP  
Homo\_sapiens --SPPPPAEAPKEPLQPEPAPPR-----PSGPATAEDPGRRPVLPQRPPPE  
Bos\_taurus --QPPPRGKTPEDVGKPSAEAPTELSTPVLTPLLPPSTPSPRPDPGQKPVLPKRRPPP  
Equus\_caballus --APPAP--WPSAQRPPRSAAAEEAEPRAAAEEAREPGQQLPAGQPPVLPKRRPPSLPPP  
Rattus\_norvegicus PLEATQGPSKTPLESTRPLEEAPEPPRLTPLPEHPAGPPQIGQPPVLPQRPLQPPPLP  
\* . . \* . . \* . . \* . . \* . . \* . . \* . . \* . . \* . . \* . . \*

C57BL/6J AWPGRGTGLPFLPGSSGVIMETGEAGPPGRMGVSGRGLPRGVDGQMGQGP IHSSEGYAGAP  
A/J AWPGRGTGLPFLPGSSGVIMETGEAGPPGRMGVSGRGLPRGVDGQMGQGP IHSSEGYAGAP  
Homo\_sapiens RPP-----QPPGSTGVIAETGQAGPPAGAGVSGRGLPRGVDGQMGQGP IHSSEGYAGAP  
Bos\_taurus LRPGWGTGLPFLPGSTGVIMETGEAGPPGRMGVSGRGLPRGVDGQMGQGP IHSSEGYAGAP  
Equus\_caballus LRPGWGTGLPFLPGSTGVIMETGEAGPRG--GGVSGRGLPQGVDDGQMGQGP IHSSEGYAGAP  
Rattus\_norvegicus AWPGRMGLPVLPGSSGVIMETGEAGPPGRMGVSGRGLPQGVDDGQMGQGP IHSSEGYAGAP  
\* \* \* \* \* \* \* \* \* \* \* \* \* \* \* \* \* \* \* \* \* \* \* \* \* \* \* \* \* \* \*

C57BL/6J GYPKSPPVTPGVPLPALVSFSAGLTQKFPFSDGGVVLFNKVLVNDGDVYNPNTGIFTAP  
A/J GYPKSPPVTPGVPLPALVSFSAGLTQKFPFSDGGVVLFNKVLVNDGDVYNPNTGIFTAP  
Homo\_sapiens GYPKSPPVASPGAPVPSLVFSFSAGLTQKFPFSDGGVVLFNKVLVNDGDVYNPNTGIFTAP  
Bos\_taurus GYPKSPVAPSPGAPVPSLVFSFSAGLTQKFPFSDAGVVLFNKVLVNDGDVYDPSTGVFTAP  
Equus\_caballus GYPKSPPVASPGLPAPSLVFSFSAGLTQKFPFSDGGVVLFNKVLVNDGDVYNPNTGIFTAP  
Rattus\_norvegicus -----GVSLPALVSFSAGLTQKFPFSDGGVVLFNKVLVNDGDVYNPNTGHTNDNL  
\* . \* : \* : \* : \* : \* : \* : \* : \* : \* : \* : \* : \* : \* : \* : \*

C57BL/6J YDGRYLITATLTPERDITYEAVLSVSNASVAQLHTAGYRREFLEYHRPPGAVHTCGGPGA  
A/J YDGRYLITATLTPERDITYEAVLSVSNASVAQLHTAGYRREFLEYHRPPGAVHTCGGPGA  
Homo\_sapiens YDGRYLITATLTPERDAYVEAVLSVSNASVAQLHTAGYRREFLEYHRPPGALHTCGGPGA  
Bos\_taurus YDGRYLITATLTPERDAYVEAVLSVANASVAQLHTAGYRREFLEYHRPPGAPHTCGGPGA  
Equus\_caballus YDGRYLITATLTPERDAYVEAVLSVSNASVAQLHTAGYRREFLEYHRPPGALHTCGGPGA  
Rattus\_norvegicus NDFLLSEMVLLGCLPPTLQPTLAQLGSRCWRCLPGT-----  
\* . \* . . : : \* : : : : . . : . .

|                   |                                                 |
|-------------------|-------------------------------------------------|
| C57BL/6J          | FHLIVHLKAGDGVNVVVTGGRLAHTDFDEMYSTFSGVFLYPFLSHL  |
| A/J               | FHLIVHLKAGDGVNVVVTGGRLAHTDFDEMYSTFSGVFLYPFLSHL  |
| Homo_sapiens      | FHLIVHLKAGDAVNIVVVTGGKLAHTDFDEMYSTFSGVFLYPFLSHL |
| Bos_taurus        | FHLIVHLKAGDGVNIVVVTGGRLAHTDFDEMYSTFSGVFLYPFLSHL |
| Equus_caballus    | FHLIVHLKAGDGVNIVVVTGGRLAHTDFDEMYSTFSGVFLYPFLSHL |
| Rattus_norvegicus | -----                                           |

**Footnote**

**Species sequence comparison of Emilin2.** \* represents identical residues; : represents conserved substitutions; . represents semi-conserved substitutions. - represents gap. Amino acid polymorphisms in A/J and B6 at consensus residues are highlighted in dark gray and at nonconsensus residues in light gray.

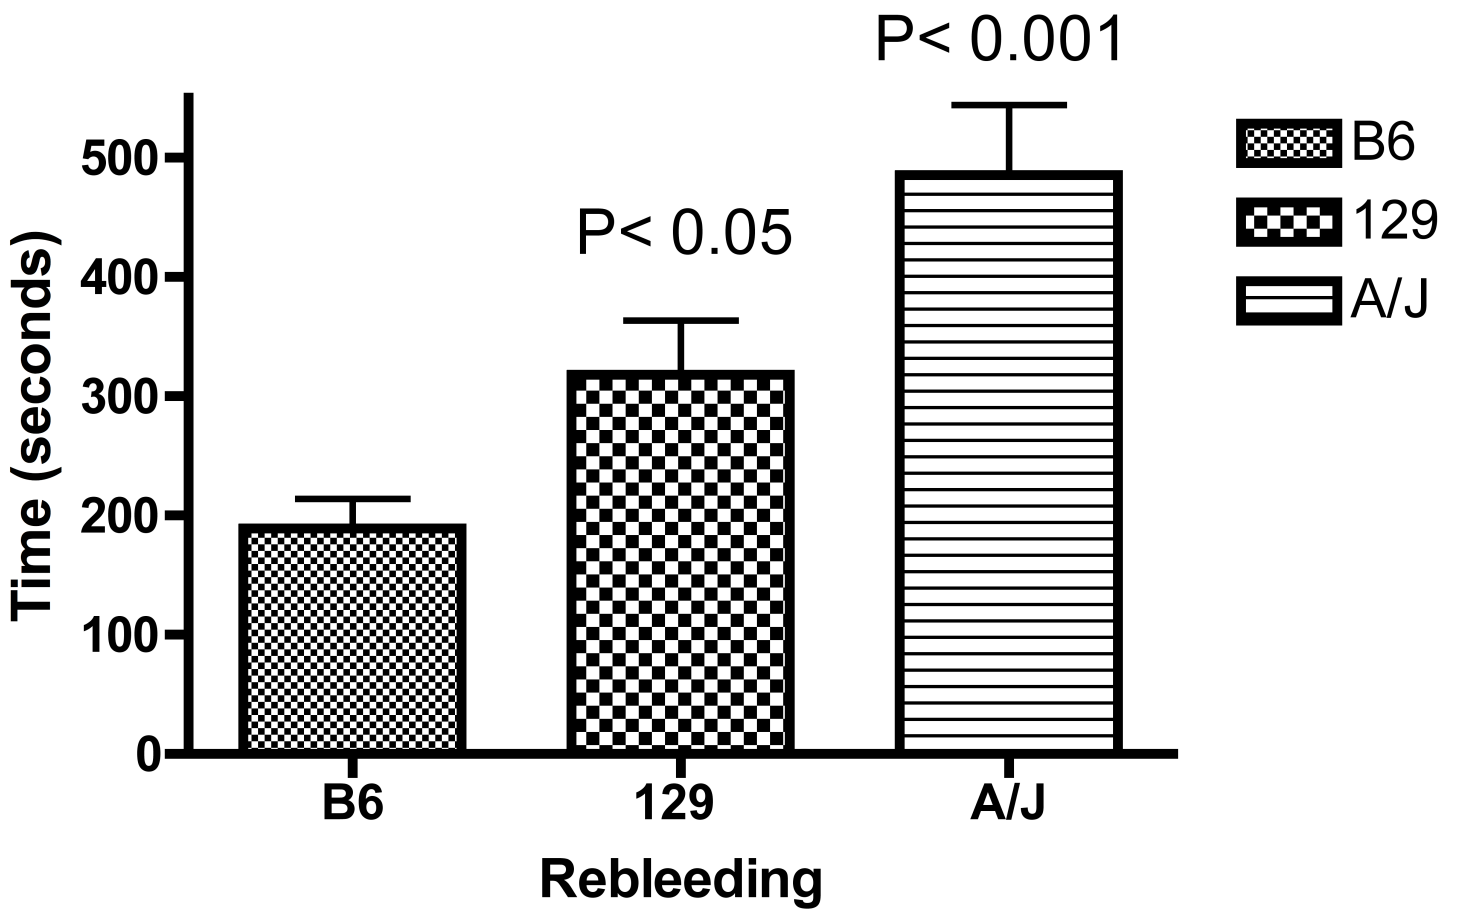

Supplement: 335_2010_9274_MOESM1_ESM.pdf [file 335_2010_9274_MOESM1_ESM.pdf]
